# Supplementary material for: On the Fatigue Performance of Friction-Stir Welded Aluminum Alloys
Source: Materials (Basel). 2020 Sep 23;13(19):4246. doi: 10.3390/ma13194246 (PMC7579519; doi:10.3390/ma13194246)
Supplement: Supplementary file 1 [file materials-13-04246-s001.pdf]

# On the Fatigue Performance of Friction-Stir Welded Aluminum Alloys

Sergey Malopheyev, Igor Vysotskiy, Daria Zhemchuzhnikova, Sergey Mironov \*  
and Rustam Kaibyshev

Laboratory of Mechanical Properties of Nanoscale Materials and Superalloys,  
Belgorod National Research University, 308015 Belgorod, Russia; malofeev@bsu.edu.ru (S.M.);  
isotsky@bsu.edu.ru (I.V.); zhemchuzhnikova@bsu.edu.ru (D.Z.); rustam\_kuibyshev@bsu.edu.ru (R.K.)  
\* Correspondence: mironov@bsu.edu.ru; Tel.: +7-4722-585455

Received: 19 August 2020; Accepted: 21 September 2020; Published: date

## Supplementary Materials

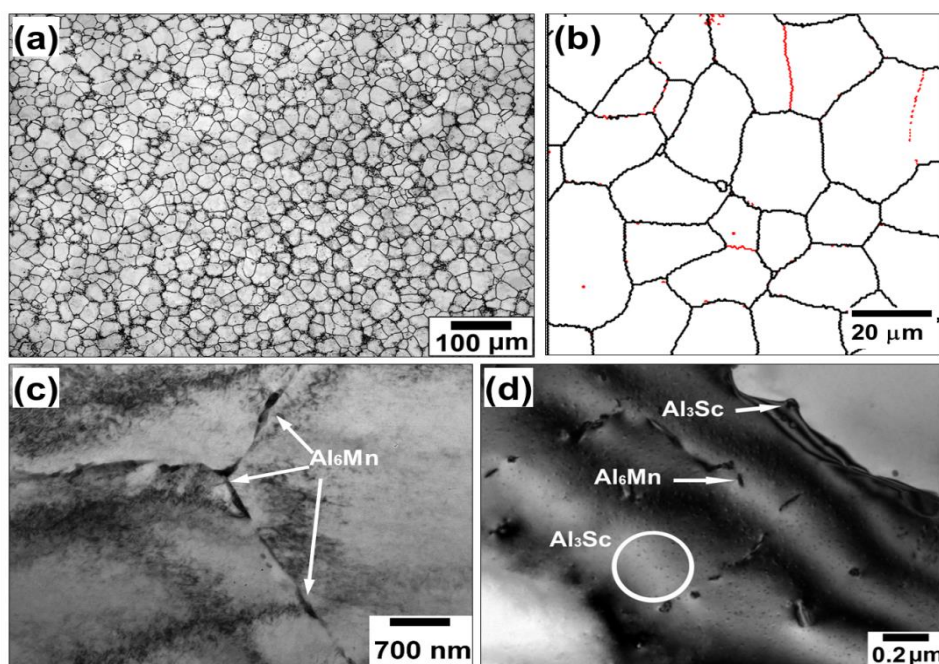

**Figure S1.** Initial microstructure of the cast Al-Mg-Sc alloy: optical micrograph (a), EBSD grain-boundary map (b) and TEM images (c, d). In (b), low-and high-angle boundaries are depicted as red and black lines, respectively.

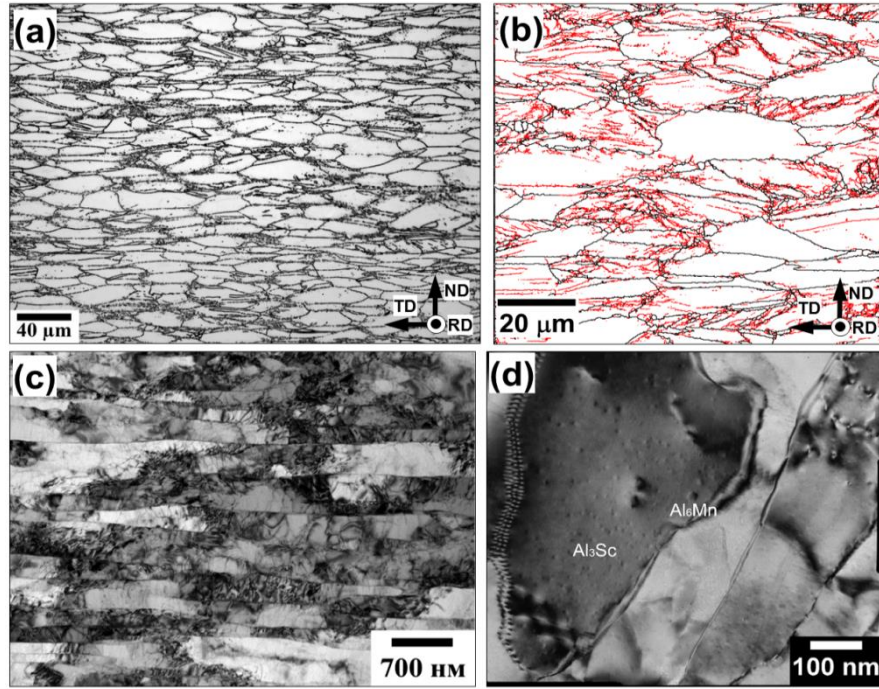

**Figure S2.** Initial microstructure of the hot-rolled Al-Mg-Sc alloy: optical micrograph (a), EBSD grain-boundary map (b) and TEM images (c), (d). In (b), low- and high-angle boundaries are depicted as red and black lines, respectively.

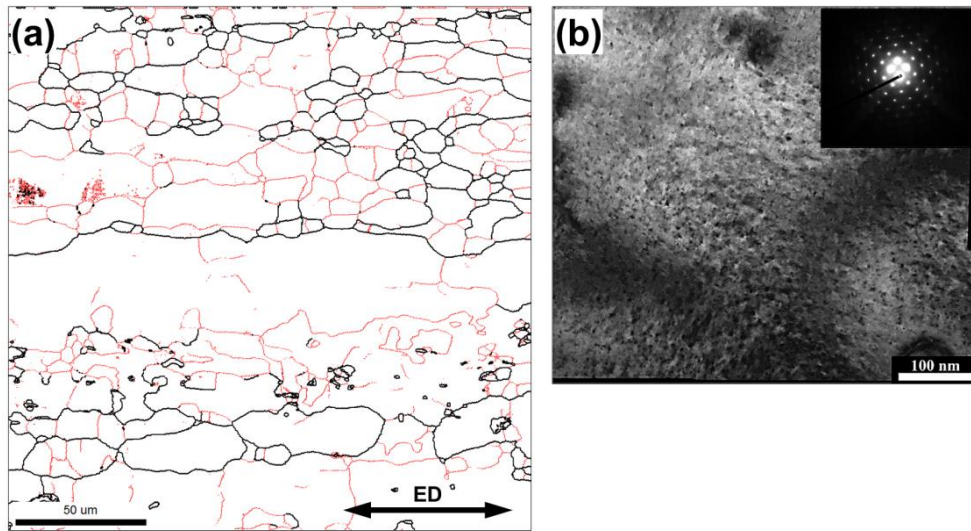

**Figure S3.** Initial microstructure of 6061 alloy: (a) EBSD grain-boundary map and (b) TEM image. ED is extrusion direction. In (a), low- and high-angle boundaries are depicted as red and black lines, respectively.

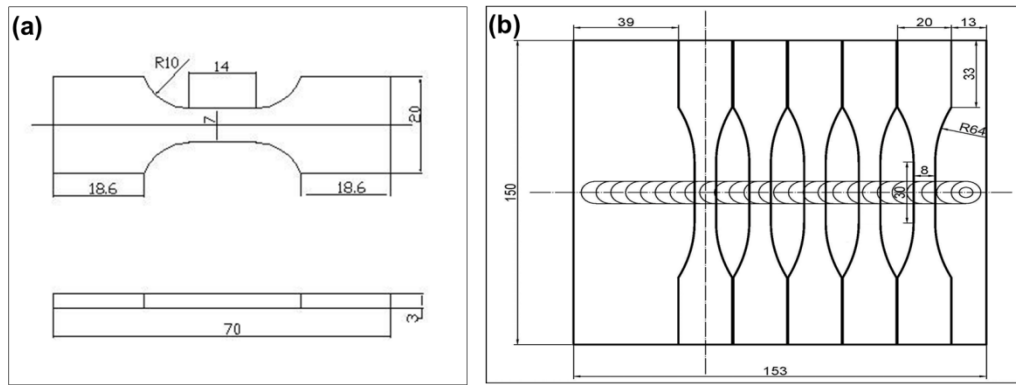

**Figure S4.** Design of the fatigue specimens machined from the welded sheets of Al-Mg-Sc alloy **(a)** and 6061 alloy **(b)**. In all cases, units are mm. Not in scale.
